# Supplementary material for: Associations of the plasma lipidome with mortality in the acute respiratory distress syndrome: a longitudinal cohort study
Source: Springer Nature journal article supplement (doi:10.1186/s12931-018-0758-3), 2018-04-10

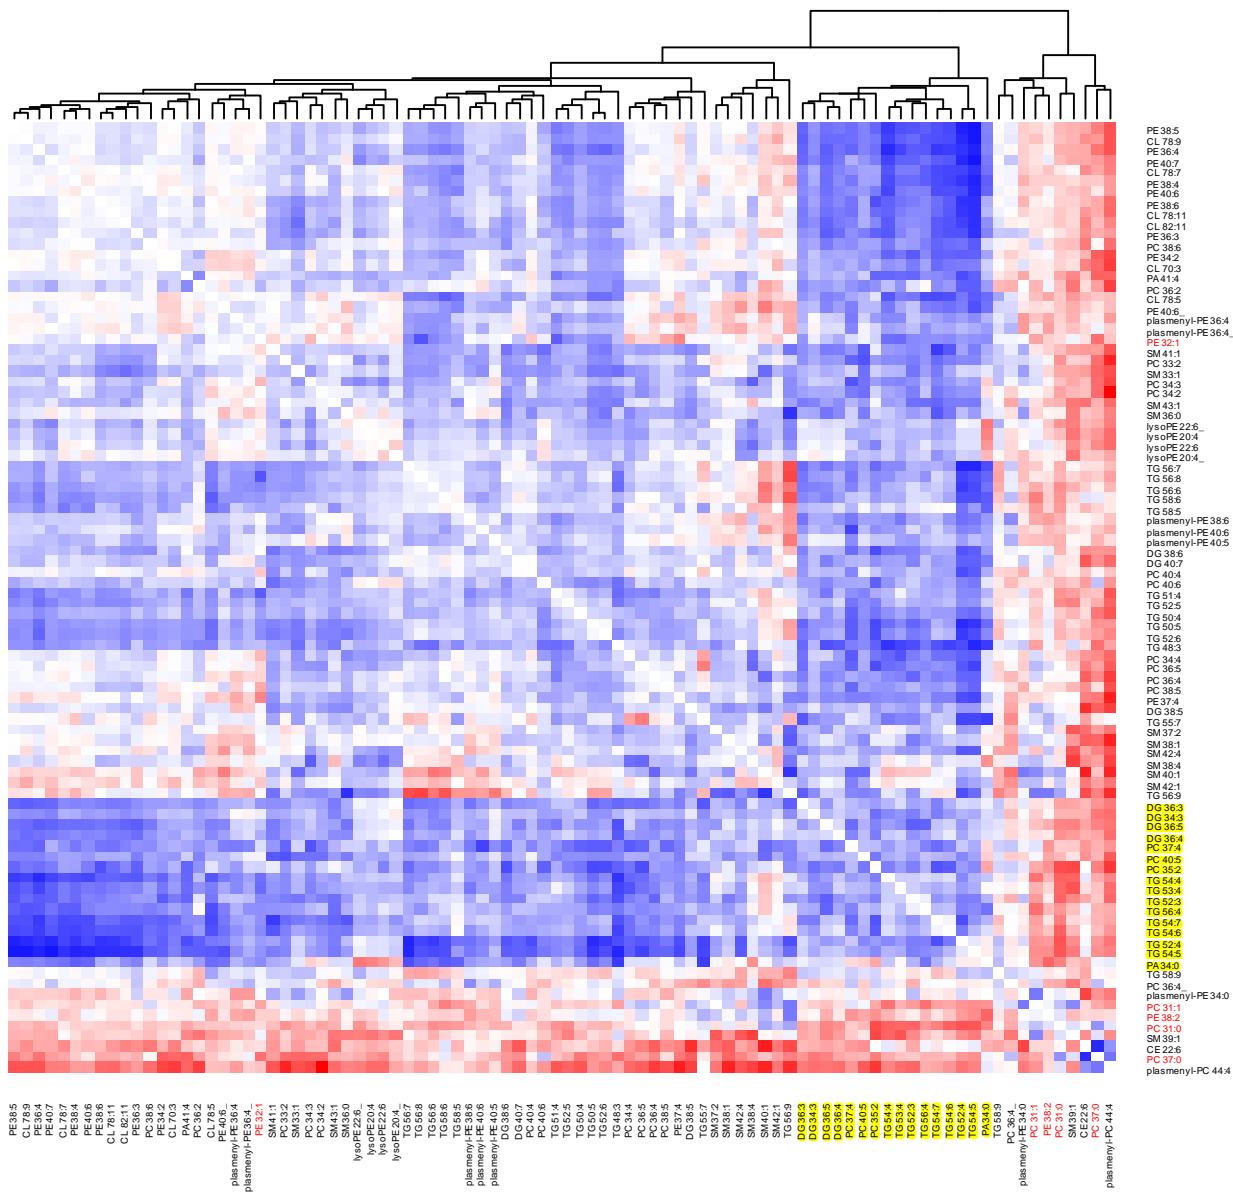

Supplement: MOESM2 [file 15604768]
